# Supplementary material for: Ipilimumab and Radiation in Patients with High-risk Resected or Regionally Advanced Melanoma
Source: Oxford University Press journal article supplement (doi:10.1158/1078-0432.ccr-20-2452), 2020-11-10
Supplement: 10780432ccr202452-sup-245909_2_supp_6652509_q69pgz.pdf [file 10780432ccr202452-sup-245909_2_supp_6652509_q69pgz.pdf]

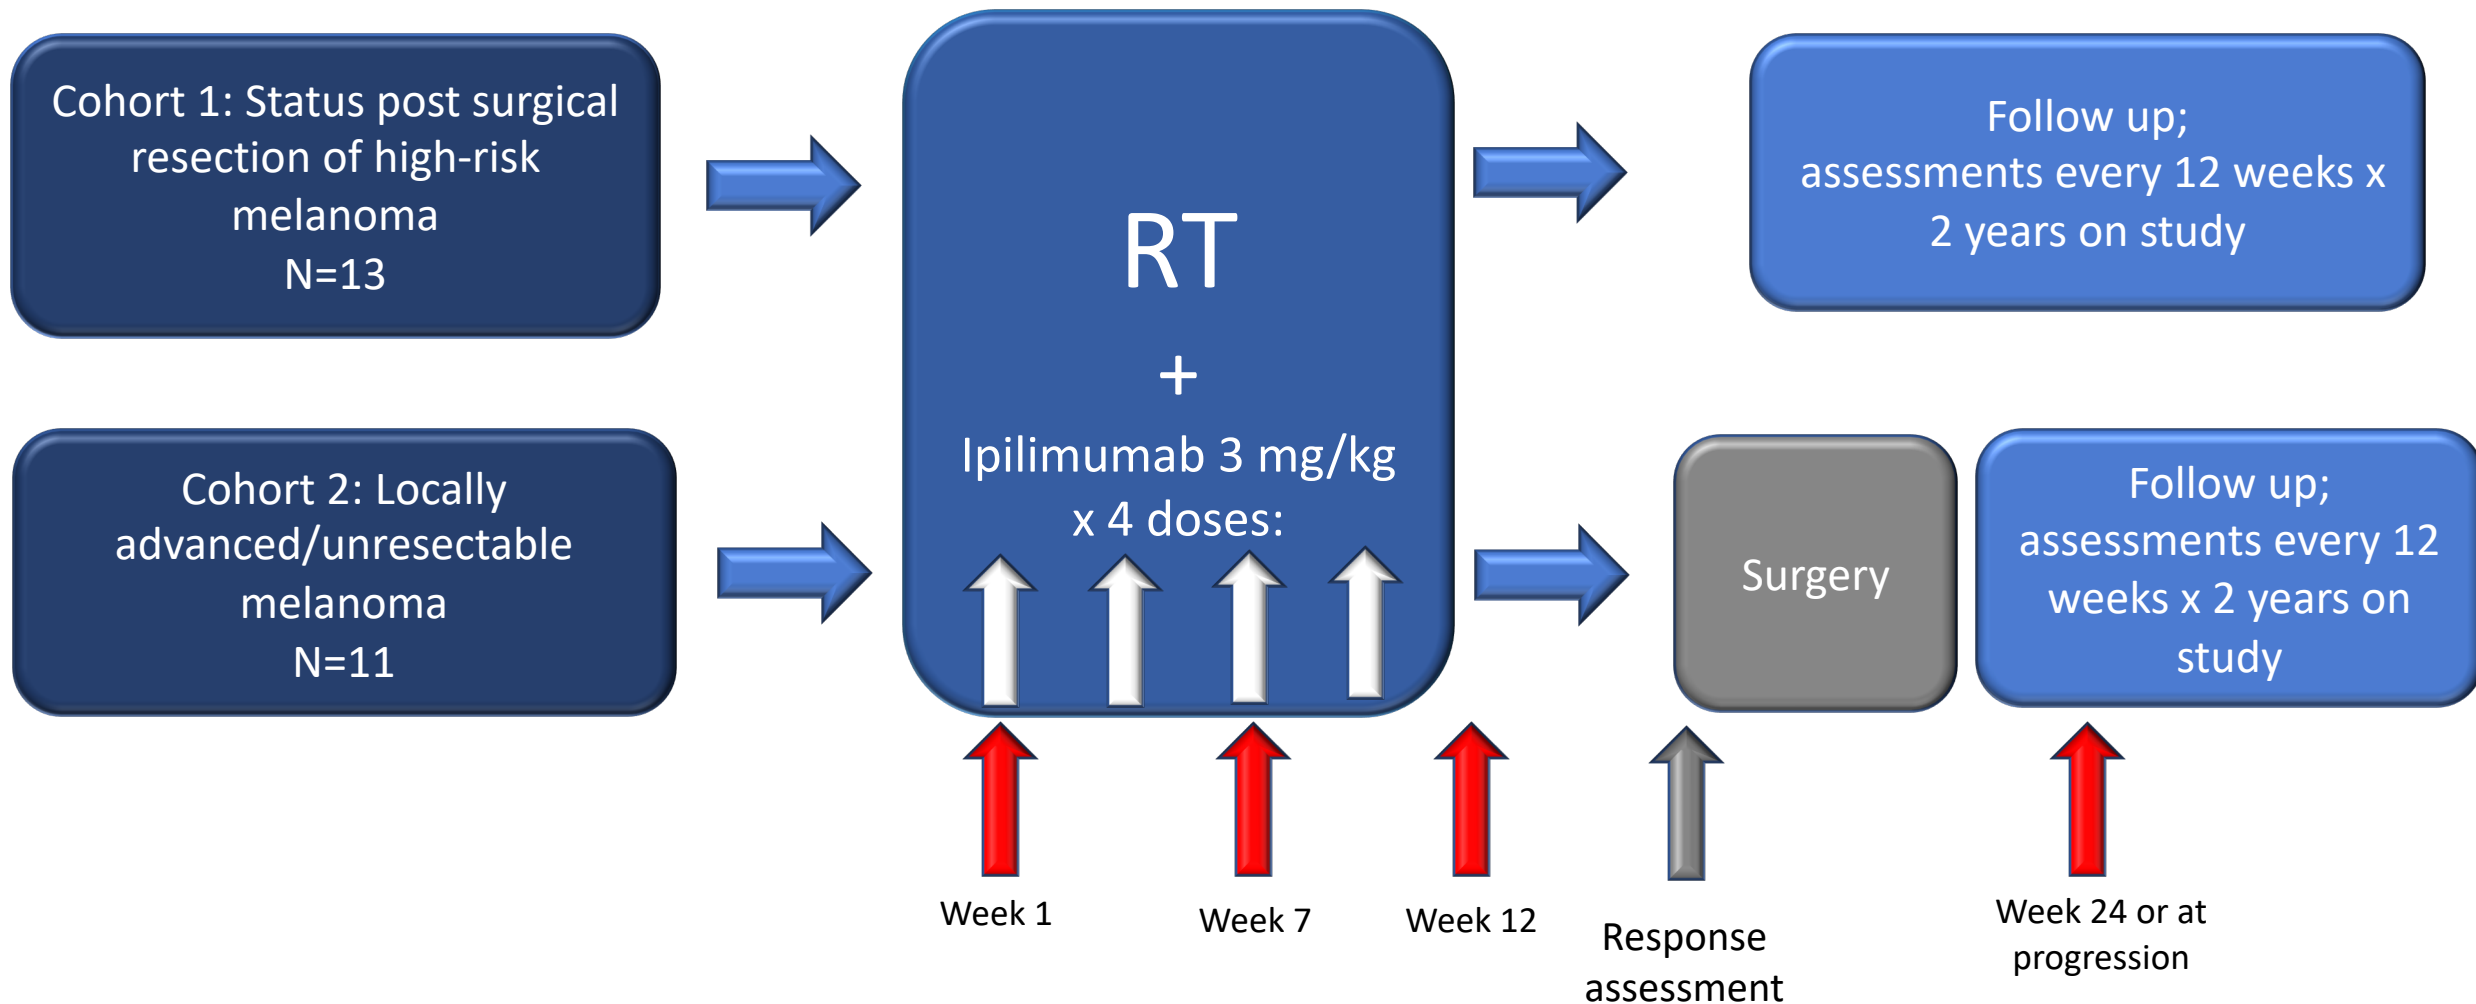

**Supplementary Figure 1. Trial Schema.** Patients could be considered for surgical resection after completion of study therapy if curative surgery was considered feasible per the treating surgeon. Red arrows represent the 4 timepoints at which PBMCs were collected for correlative for correlative analyses: week 1 (prior to the start of ipilimumab), week 7 (on treatment), week 12 (completion of therapy), and week 24/progression (whichever came first).
